# Supplementary material
Source: PubMed Central journal article supplement (PMC6547157)
Supplement: jamainternmed-179-1105-s001.pdf [file jamainternmed-179-1105-s001.pdf]

## Supplementary Online Content

Lee I-M, Shiroma EJ, Kamada M, Bassett DR, Matthews CE, Buring JE.  
Association of step volume and intensity with all-cause mortality in older women.  
*JAMA Intern Med*. Published online May 29, 2019.  
doi:10.1001/jamainternmed.2019.0899

**eTable 1.** Hazard Ratios and 95% Confidence Intervals for All-Cause Mortality by Mean Steps per Day – Sensitivity analysis #1: excluding the first year of follow-up and women with prevalent cardiovascular disease, cancer or diabetes

**eTable 2.** Hazard Ratios and 95% Confidence Intervals for All-Cause Mortality by Mean Steps per Day – Sensitivity analysis #2: excluding women who self-reported their health as less than excellent/good

**eTable 3.** Hazard Ratios and 95% Confidence Intervals for All-Cause Mortality by Mean Steps per Day – Sensitivity analysis #3: excluding women with body mass index  $<18.5 \text{ kg/m}^2$

This supplementary material has been provided by the authors to give readers additional information about their work.

1 **Supplemental Tables**

2

3 **eTable 1** Hazard Ratios and 95% Confidence Intervals for All-Cause Mortality by Mean Steps per Day – Sensitivity analysis #1:  
4 excluding the first year of follow-up and women with prevalent cardiovascular disease, cancer or diabetes

5

6 **eTable 2** Hazard Ratios and 95% Confidence Intervals for All-Cause Mortality by Mean Steps per Day – Sensitivity analysis #2:  
7 excluding women who self-reported their health as less than excellent/good

8

9 **eTable 3** Hazard Ratios and 95% Confidence Intervals for All-Cause Mortality by Mean Steps per Day – Sensitivity analysis #3:  
10 excluding women with body mass index  $<18.5 \text{ kg/m}^2$

11

12

13

14 **eTable 1.**

15

16 **Hazard Ratios and 95% Confidence Intervals for All-Cause Mortality by Mean Steps per Day –**

17 Sensitivity analysis #1: excluding the first year of follow-up and women with prevalent cardiovascular disease, cancer or diabetes

18

19

|                   | No. of Cases /<br>No. of Women | Hazard Ratio (95% Confidence Interval)* |                   |                   |
|-------------------|--------------------------------|-----------------------------------------|-------------------|-------------------|
|                   |                                | Model 1                                 | Model 2           | Model 3           |
| Mean steps/d      |                                |                                         |                   |                   |
| Q1 (lowest)       | 129 / 2,855                    | Reference                               | Reference         | Reference         |
| Q2                | 59 / 3,233                     | 0.60 (0.44, 0.83)                       | 0.69 (0.50, 0.95) | 0.65 (0.47, 0.90) |
| Q3                | 48 / 3,468                     | 0.55 (0.39, 0.79)                       | 0.66 (0.45, 0.94) | 0.58 (0.40, 0.84) |
| Q4 (highest)      | 30 / 3,541                     | 0.40 (0.26, 0.61)                       | 0.50 (0.32, 0.78) | 0.41 (0.26, 0.65) |
| p, trend          |                                | <0.01                                   | <0.01             | <0.01             |
| Per 1,000 steps/d |                                | 0.85 (0.79, 0.90)                       | 0.89 (0.83, 0.95) | 0.86 (0.80, 0.92) |

20

21 \* Model 1 is adjusted for age and wear time. Model 2 is adjusted for Model 1 variables plus smoking; alcohol; intakes of saturated  
 22 fat, fiber, fruits and vegetables; hormone therapy; parental history of myocardial infarction; family history of cancer; general health;  
 23 cancer screening. Model 3 is adjusted for Model 2 variables plus body mass index; history of hypertension, high cholesterol.

24

25 **eTable 2.**

26  
27 **Hazard Ratios and 95% Confidence Intervals for All-Cause Mortality by Mean Steps per Day –**  
28 **Sensitivity analysis #2: excluding women who self-reported their health as less than excellent/good**  
29

30

|                   | No. of Cases /<br>No. of Women | Hazard Ratio (95% Confidence Interval)* |                   |                   |
|-------------------|--------------------------------|-----------------------------------------|-------------------|-------------------|
|                   |                                | Model 1                                 | Model 2           | Model 3           |
| Mean steps/d      |                                |                                         |                   |                   |
| Q1 (lowest)       | 228 / 3,903                    | Reference                               | Reference         | Reference         |
| Q2                | 101 / 4,082                    | 0.58 (0.46, 0.74)                       | 0.65 (0.51, 0.83) | 0.60 (0.47, 0.77) |
| Q3                | 74 / 4,125                     | 0.50 (0.37, 0.66)                       | 0.56 (0.42, 0.75) | 0.50 (0.37, 0.67) |
| Q4 (highest)      | 47 / 4,137                     | 0.37 (0.26, 0.52)                       | 0.44 (0.31, 0.62) | 0.36 (0.25, 0.52) |
| p, trend          |                                | <0.01                                   | <0.01             | <0.01             |
| Per 1,000 steps/d |                                | 0.82 (0.78, 0.87)                       | 0.85 (0.81, 0.90) | 0.83 (0.78, 0.87) |

31

32 \* Model 1 is adjusted for age and wear time. Model 2 is adjusted for Model 1 variables plus smoking; alcohol; intakes of saturated  
33 fat, fiber, fruits and vegetables; hormone therapy; parental history of myocardial infarction; family history of cancer; general health;  
34 history of cardiovascular disease; history of cancer; cancer screening. Model 3 is adjusted for Model 2 variables plus body mass  
35 index; history of hypertension, high cholesterol, diabetes.  
36

37 **eTable 3.**

38  
39 **Hazard Ratios and 95% Confidence Intervals for All-Cause Mortality by Mean Steps per Day –**  
40 **Sensitivity analysis #3: excluding women with body mass index <18.5 kg/m<sup>2</sup>**  
41  
42

|                   | No. of Cases /<br>No. of Women | Hazard Ratio (95% Confidence Interval)* |                   |                   |
|-------------------|--------------------------------|-----------------------------------------|-------------------|-------------------|
|                   |                                | Model 1                                 | Model 2           | Model 3           |
| Mean steps/d      |                                |                                         |                   |                   |
| Q1 (lowest)       | 254 / 4,077                    | Reference                               | Reference         | Reference         |
| Q2                | 97 / 4,106                     | 0.50 (0.40, 0.64)                       | 0.59 (0.46, 0.76) | 0.55 (0.43, 0.71) |
| Q3                | 74 / 4,111                     | 0.44 (0.34, 0.58)                       | 0.55 (0.41, 0.73) | 0.48 (0.36, 0.65) |
| Q4 (highest)      | 47 / 4,047                     | 0.33 (0.24, 0.46)                       | 0.43 (0.30, 0.60) | 0.35 (0.25, 0.50) |
| p, trend          |                                | <0.01                                   | <0.01             | <0.01             |
| Per 1,000 steps/d |                                | 0.80 (0.76, 0.85)                       | 0.85 (0.81, 0.90) | 0.83 (0.78, 0.87) |

43  
44 \* Model 1 is adjusted for age and wear time. Model 2 is adjusted for Model 1 variables plus smoking; alcohol; intakes of saturated  
45 fat, fiber, fruits and vegetables; hormone therapy; parental history of myocardial infarction; family history of cancer; general health;  
46 history of cardiovascular disease; history of cancer; cancer screening. Model 3 is adjusted for Model 2 variables plus body mass  
47 index; history of hypertension, high cholesterol, diabetes.  
48  
49
